1 Sensitivity in the antioxidant system of discus fish (*Symphysodon*  
2 spp.) to cold temperature: evidence for species-specific cold  
3 resistance

4

5 Shi-Rong Jin<sup>1,2,3,a</sup>, Bin Wen<sup>1,2,3,a</sup>, Zai-Zhong Chen<sup>1,2,3,\*</sup>, Jian-Zhong Gao<sup>1,2,3\*</sup>, Lei  
6 Wang<sup>1,2,3</sup>, Ying Liu<sup>1,2,3</sup>, Han-Peng Liu<sup>1,2,3</sup>

7 <sup>1</sup>Key Laboratory of Freshwater Aquatic Genetic Resources, Ministry of Agriculture,  
8 Shanghai Ocean University, Shanghai 201306, China

9 <sup>2</sup>Key Laboratory of Exploration and Utilization of Aquatic Genetic Resources,  
10 Ministry of Education, Shanghai Ocean University, Shanghai 201306, China

11 <sup>3</sup>Shanghai Collaborative Innovation for Aquatic Animal Genetics and Breeding,  
12 Shanghai Ocean University, Shanghai 201306, China

13 <sup>a</sup>These authors contributed equally to this work

14 \*Corresponding author

15 E-mail: chenzz@shou.edu.cn; jzhgao@shou.edu.cn

16 Tel: +86-21-61900412

17 Fax: +86-21-61900412

18

19 **ABSTRACT**

20 The discus fish (*Symphysodon* spp.) is an endemic species of the Amazon that is  
21 among the most popular ornamental fish around the world, and is usually used as the  
22 model animal for studying the diversification of Amazon fish. Here, a comparative  
23 analysis of two species of discus fish, i.e., *S. haraldi* and *S. aequifasciatus*, based on  
24 several antioxidant indexes was conducted, to test the hypothesis that cold resistance  
25 might correlate with the diversification of discus fish. We set up a continuous  
26 sequence of three temperature programs, namely cooling (28 °C to 14 °C; -1 °C/h),  
27 cold maintenance (14 °C for 12 h) and recovery (14 °C to 28 °C; +1 °C/h).  
28 Subordinate function (SF) combined with principal component analysis (PCA)  
29 showed that the cold hardiness of *S. haraldi* during cold treatment was in the order of  
30 cooling > cold maintenance ≈ recovery, but the cold hardiness of *S. aequifasciatus*  
31 during cold treatment was in the order of cold maintenance > cooling > recovery.  
32 Specifically, the lowest cold hardiness was observed in *S. aequifasciatus* during  
33 recovery, indicating that cold stress resulted in more seriously oxidative stress in *S.*  
34 *aequifasciatus* than in *S. haraldi*. Overall, these results show a significant interspecific  
35 variation, indicating the correlation between environmental adaptation and the  
36 diversification of discus fish.

37 **Keywords:** Cold stress; Discus fish; Antioxidant response; Species-specific

38

## 39 1. Introduction

40 The discus fish (*Symphysodon* spp.) is an important ornamental tropical fish all over  
41 the world, originating from the Amazon River (Wen et al., 2018, 2017). In addition to  
42 their Amazon basin-wide distribution, the 3 currently recognized species of the genus  
43 *Symphysodon* (*S. aequifasciatus*, *S. discus*, and *S. haraldi*, Cichlidae, Perciformes)  
44 (Bleher et al., 2007; Gross et al., 2009) exhibit a large amount of morphological  
45 variation (different color and color patten) and genetic variability associated with  
46 different types of biotopes (Farias and Hrbek, 2008; Koh et al., 1999). For example, *S.*  
47 *haraldi*, the ‘bule’ discus, is found in the central portion of the Amazon basin (type  
48 locality Manacapuru river), *S. aequifasciatus*, the ‘green’ discus, is found in the west  
49 portion of the Amazon basin (type locality Tef’e River), and *S. discus*, the. Heckel  
50 discus, is found in the Negro River basin (Farias and Hrbek, 2008; Gross et al., 2010).

51 Fish as an ectotherm, ambient temperature which constrains whole-organism  
52 performance is one of the most important factors affecting the biogeographic  
53 distribution and abundance (Troia and Gido, 2017). Recently, several studies have  
54 shown that distinct responses of antioxidant defense systems (ADS) would occur  
55 between different locations of fish species toward temperature stress (e.g., Bryant et  
56 al., 2018; Chung et al., 2017; Johnston et al., 1998; Rudneva-Titova et al., 1994  
57 Shaliutinakolešová et al., 2013). Yet surprisingly few studies have compared thermal  
58 performance among closely related warm-water species (Troia and Gido, 2015).

59 We have a hypothesis that, depending on the geographic region and due the  
60 evolution, different species of discus fish may have different sensitivity to cold stress.

61 To examine whether species-specific cold hardiness of discus fish, we exposed two  
62 species of discus fish (*S. haraldi* and *S. aequifasciatus*) to an acute cold stress,  
63 including a rapid temperature decrease (from 28 to 14° C), maintained up to 12 h, and  
64 then rapidly increase (from 14 to 28° C). ROS generation, ADS together with  
65 oxidative damage production were measured with the assumption that they were  
66 indicators of cold hardiness. Comprehensive evaluation using subordinate function  
67 (SF) method combined with principal component analysis (PCA) revealed cold  
68 hardiness of different species of discus fish.

## 69 **2. Materials and methods**

### 70 2.1 Experimental design

71 Juvenile discus fish (*S. haraldi* and *S. aequifasciatus*, body weight  $9.24 \pm 1.63$  g) were  
72 obtained from the Ornamental Fish Breeding Laboratory, Shanghai Ocean University  
73 (Shanghai, China). Then, 60 juvenile fish of each species were randomly divided into  
74 3 glass aquaria (150 L), and acclimated at a temperature of 28 °C for a period of 30  
75 days before the temperature trial. After acclimation, all fishes were subjected to a  
76 continuous sequence of three thermal treatments (namely cooling, cold maintenance  
77 and recovery) each. A schematic representation of the experimental procedure is  
78 provided in Fig. 1. First, the temperature in six aquaria initially decreased from 28 °C  
79 to 14 °C by 1 °C/h (cooling) and 9 fish (3 fish/aquaria) of each species were randomly  
80 sampled at t1 (28 °C), t2 (21 °C) and t3 (14 °C), respectively. When the coldest  
81 experimental temperature of 14 °C was attained, then fish were maintained at 14 °C  
82 for 12 h (cold maintenance) and other 9 specimens (3 fish/aquaria) of each species

83 were collected at t4 (6 h) and t5 (12 h), respectively. At the end of experiment period,  
84 the remaining fish returned from 14 °C to the initial temperature value of 28 °C by  
85 1 °C/h (recovery) and all were finally sacrificed and sampled at t6 (5 fish/aquaria; 15  
86 fish totals per species). All animal care was conducted in accordance with the  
87 Administrative Measures for Experimental Animals in Shanghai, and the experimental  
88 protocols were approved by the Animal Ethics Committee of Shanghai Ocean  
89 University (SHOU IACUC protocol # 20171015).

## 90 2.2 Sampling procedures

91 At each sampling times, the gill tissues were excised from each fish, rapidly  
92 deep-frozen in liquid nitrogen and stored at -80 °C for further analyses. On the one  
93 hand, gill samples were filtered by 300 mesh screens after homogenized (1:2, w/v) in  
94 ice-cold phosphate buffer (PBS; 0.1 M, pH 7.4). The single cell suspensions were  
95 used to measure the reactive oxygen species (ROS) content. On the other hand, the  
96 sampled gill tissues were homogenized (1:9, w/v) in an ice-cold NaCl 0.7% solution.  
97 The obtained homogenates were centrifuged at 3000 g at 4 °C for 10 min, and the  
98 supernatant were collected for other analysis.

99 Indicator tests were performed using classical colorimetric methods with  
100 commercial kits (Nanjing Jiancheng Bioengineering Institute, Nanjing, China). All  
101 assays, except ROS, were quantified spectrophotometrically, with a Synergy H4  
102 Hybrid Multi-Mode microplate reader (BioTek Instruments, Winooski, VT, USA).

## 103 2.3 Reactive oxygen species (ROS) contents analysis

104 ROS level was measured using 2, 7-dichlorodihydrofluorescein diacetate

105 (H2DCFDA; Molecular Probes, Nanjing Jiancheng Bioengineering Institute, Nanjing,  
106 China), which was oxidized to fluorescent dichlorofluorescein (DCF) by intra-cellular  
107 ROS. A BD Accuri™ C6 flow cytometer (BD Biosciences) was used to analyze the  
108 ROS content. Data were recorded as cell cytograms showing the granularity (SSC  
109 value), relative size (FSC value), and fluorescent channels for each parameter. Each  
110 sample analysis included a total of 20,000 events, and the flow speed was maintained  
111 at less than  $300 \text{ s}^{-1}$ . FL1 fluorescent channel were set to evaluate it (Wang et al., 2012).

#### 112 2.4 Antioxidant enzymatic measurements

113 Total superoxide dismutase (SOD) activity was measured at 550 nm using the  
114 xanthine oxidase method that the protein amount giving 50% inhibition of maximum  
115 colour development contained 1 unit (U) of SOD (McCord and Fridovich, 1969). The  
116 results are accordingly given as U SOD/mg protein.

117 Catalase (CAT) activity was based on the reaction of the enzyme with methanol  
118 in the presence of an optimal concentration of H<sub>2</sub>O<sub>2</sub> (Johansson and Borg, 1988). The  
119 purple color formed in these reactions was measured at 405 nm to measure CAT  
120 activity.

121 The activity of glutathione peroxidase (GPx) was measured at 412 nm, because  
122 GSSG occurs in the medium reduced to GSH by GPx and rate of GSH oxidation was  
123 used to calculate GPx activity (Hafeman et al., 1974). It calculated in terms of  
124 decreasing in GSH concentration by 1  $\mu\text{mol/L}$  as one unit of enzyme activity.

125 Glutathione reductase (GR) activity was indirectly determined by mea-suring  
126 nicotinamide adenine dinucleotide phosphate (NADPH) consumption. Then the

127 decrease in NADPH absorbance at 340nm was measured with a spectrophotometer  
128 (Carlberg and Mannervik, 1975).

129 Glutathione-S transferase (GST) activity was assayed by following the formation  
130 of glutathione–chlorodinitrobenzene (CDNB) adduct at 412 nm by the decreasing in  
131 reduced GSH concentration (Habig et al., 1974).

## 132 2.5 Glutathione contents analysis

133 The level of reduced Glutathione (GSH) was measured at 412 nm by using  
134 5,5'-dithiobis(2-nitrobenzoic acid) (DTNB) reagent, following the method of Tietze  
135 (1969). DTNB was reduced by the free sulfhydryl groups of GSH to form the yellow  
136 compound 5-thio-2-nitrobenzoic acid (TNB).

## 137 2.6 Oxidative damage measurements

138 Malondialdehyde (MDA) and protein Carbonylation (PC) contents are relatively  
139 direct indexes for low-temperature damage (Ren et al., 2018; Vinagre et al., 2012; Ye  
140 et al., 2016). The higher content, the lower hardness showed.

141 PC was measures via a reaction with 2,4-dinitrophenylhydrazine DNPH followed  
142 by TCA precipitation as previously described (Levine et al., 1994; Reznick and Packer,  
143 1994).

144 MDA occurs in lipid peroxidation and this is measured after incubating at 95 °C  
145 with thibabaturic acid (TBA) in aerobic condition (pH 3.4) (Uchiyama and Mihara,  
146 1978). The pink colour formed in these reactions is measures in the  
147 spectrophotometer at 532 nm to measure MDA levels (Ohkawa et al., 1979).

## 148 2.7 Statistical analyses

149 For all parameters, data were expressed as mean  $\pm$  standard error (SE). Statistical  
150 analyses were performed using SPSS, PASW statistics 20.0. A one-way analysis of  
151 variance (ANOVA) was performed to test for the effects of sampling species and  
152 temperature on the oxidative stress response values (tested separately) followed by the  
153 Tukey test. A significance level of 0.05 was used in all test procedures.

154 To intuitively inspect the tendencies in the variation of hardness indexes  
155 between the temperature processing and species, we produced a heat map and  
156 comprehensively evaluated hardness indexes using subordinate function (SF) method  
157 combined with principal component analysis (PCA) and correlation analysis.

158 Follow the data were standardized by Z-score, the heatmap was constructed by  
159 Sanger (V1.0.9).

160 Principal component analysis (PCA) and correlation analysis were performed  
161 using SPSS.

162 Subordinate function values were calculated, and average membership and cold  
163 resistance of different discus species were analyzed according to Zhang et al. (2015)  
164 and Zhao et al. (2019)

$$165 \quad u(X_i) = (X_i - X_{\min}) / (X_{\max} - X_{\min}) \quad (i=1, 2, \dots, n) \quad (1)$$

166 Weights of various comprehensive indicators were calculated as:

$$167 \quad W_i = P_i / \sum_{i=1}^n P_i \quad (i=1, 2, \dots, n) \quad (2)$$

168 The D values of the different treatments were calculated as:

$$169 \quad D = \sum_{i=1}^n [u(X_i) \times W_i] \quad (i=1, 2, \dots, n) \quad (3)$$

170  $X_i$ ,  $X_{\min}$ ,  $X_{\max}$  and  $W_i$  are the score, minimum score, maximum scores and



171 importance (weight) of the  $i$ th comprehensive indicator, respectively;  $P_i$  is the  
172 contribution rate of the  $i$ th comprehensive indicator of various treatments of two  
173 species;  $D$  is the comprehensive evaluation value for adaptability.

### 174 **3. Results**

#### 175 3.1 Reactive oxygen species (ROS)

176 ROS level showed a slight fluctuation in *S. aequifasciatus* from  $t_1$ -  $t_5$  (cooling and  
177 cold maintenance) until it reached the lowest value, then it showed a sharp rise during  
178 recovery. On the contrary, ROS level showed a sharp rise first ( $t_1$ - $t_2$ ) in *S. haraldi*,  
179 then progressively decrease and recovered to initial level. Due to high individual  
180 variability, the latter value was always statistically significantly higher than the former  
181 except  $t_6$  ( $p < 0.05$ ) (Fig. 2).

#### 182 3.2 Antioxidant enzymatic activities

183 The temperature effects on antioxidant enzymatic system in two species are  
184 represented in Fig. 3. There were no effect of temperature on SOD (Fig. 3a) and GR  
185 (Fig. 3b) activity in *S. haraldi*, but in *S. aequifasciatus*, only CAT (Fig. 3c) activity  
186 was not affected. During cooling, SOD activity and GPx (Fig. 3d) activities showed  
187 an increase trend in *S. aequifasciatus*. In *S. haraldi*, CAT activity increased first and  
188 then recovered, while GPx activity decreased first and then significant increased  
189 during cooling. During cold maintenance, GPx and GR activities increased in *S.*  
190 *aequifasciatus*, but SOD activity showed decrease. Oppositely, there were no affects  
191 in *S. haraldi* during cold maintenance, except GPx activity showed fluctuation.  
192 During recovery, in both species, all antioxidant enzymatic activities except GST were

193 recovered. GST activity was progressively increased in both species throughout the  
194 experiment (Fig. 3e), and finally *S. aequifasciatus* value was higher ( $p < 0.05$ ) than *S.*  
195 *haraldi*.

### 196 3.3 Glutathione contents

197 Neither *S. aequifasciatus* nor *S. haraldi* showed significant response under cold stress  
198 on GSH content (Fig. 4). However, the latter value was always significantly higher  
199 than the former value.

### 200 3.4 Oxidative damage

201 During cooling, there were no significant effects on PC (Fig. 5a) and MDA (Fig. 5b)  
202 content in both species. During cold maintenance, an increase in PC content were  
203 found in *S. aequifasciatus*, and MDA content significant increase in both species.  
204 During recovery, MDA content remained at highest level in *S. aequifasciatus*, but  
205 decreased in *S. haraldi*. PC content was not affected in both species during recovery.

### 206 3.5 Correlation analysis and comprehensive analysis on hardiness indexes for 207 different discus fish species

208 Table 3 showed that the GPx, GR, GSH, GST, SOD activities had positive correlation  
209 with ROS content, and ROS content had negative correlation with CAT activity and  
210 MDA, PC content. PC content had significant and negative correlation with SOD  
211 activity. MDA content had significant and positive correlation with CAT and SOD  
212 activities, while had significant and negative correlation with GPx and GST activities.

213 The heat map synthesize the expression values of all hardiness indexes for the  
214 two species during cold treatment (Fig. 6). The value of hardiness indexes in discus

215 fish differed in different species under different temperature treatment, as evident  
216 from the intensity of colors (level of expression). In *S. haraldi*, GSH activity was the  
217 only index sustained up-regulated throughout the treatment, meanwhile GST activity  
218 was significantly up-regulated at the end. But in *S. aequifasciatus*, most of the  
219 hardness indexes were seriously affected by low temperature, and significantly  
220 up-regulated, such as SOD, GPx, GR, GST activities and ROS, PC, MDA contents.

221 3.6 Using Principal component analysis (PCA) and Subordinate Function (SF) to

222 Evaluate Hardiness of two species

223 As can be seen from Table 2, the first, second, and third principal component variance  
224 contribution rates reached 49.921, 27.723, and 12.658%, respectively. Notably, the  
225 cumulative variance contribution rate was 90.302% (more than 85%) without missing  
226 variables. Therefore, the first three principal components can reflect completely the  
227 different information of the cold resistance system and most of the data had already  
228 been included in the three principal components.

229 Subordinate function values of various comprehensive indicators of each  
230 treatment were calculated in accordance with Equation (1) (Table 3) following PCA.

231 For the same comprehensive indicator, such as Z1, the maximum  $u(X_1)$  was 1.000  
232 for the *S. aequifasciatus*-cold maintenance treatment and 0.000 for *S.*  
233 *aequifasciatus*-cooling. This suggested that when only Z1 was considered, *S.*  
234 *aequifasciatus* showed the highest level of adaptability to the cold maintenance  
235 treatment, whereas its adaptability to the cooling treatment was the lowest. The  
236 adaptabilities to the remaining treatments were sorted according to the value of  $u(X_i)$ .

237 Based on the contribution of various comprehensive indicators, the weights were  
238 calculated in accordance with Equation (2). The results showed that the three  
239 comprehensive indicators had weights of 0.553, 0.307 and 0.140, respectively (Table  
240 3).

241 The comprehensive physiological adaptability capabilities of two species to  
242 various water temperature were calculated in accordance with Equation (3) (Table 3),  
243 and sorted based on the value of D. The higher D value, the higher cold hardiness  
244 showed. To be specific, the cold hardiness of *S. haraldi* during cold treatment was in  
245 the order of cooling > cold maintenance  $\approx$  recovery, and the cold hardiness of *S.*  
246 *aequifasciatus* during cold treatment was in the order of cold maintenance > cooling >  
247 recovery. It is important to note that the minimum D value was obtained for *S.*  
248 *aequifasciatus* during recovery, suggesting the lowest cold hardiness, whereas the  
249 cold hardiness based of *S. aequifasciatus* during cold maintenance and for *S. haraldi*  
250 during cooling were classified as highest level.

## 251 **4. Discussion**

### 252 4.1 Oxidative stress levels increased in both species by acute cold stress

253 Many studies have found that an acute temperature decrease has an influence on  
254 haematological and metabolic processes (Ban, 2000; Sun et al., 1995), which could  
255 promote the generation of ROS (Joe 2017; Martínez-Álvarez et al., 2005). This is  
256 agree with present finding in two discus fish. Under oxidative stress, antioxidant  
257 defense system inhibiting an excess of oxyradical formation (Joe., 2017; Ren et al.,  
258 2018; Vinagre et al., 2012; Ye et al., 2015). For example, Malek (2004) found that

259 SOD and GPx isoforms and thioredoxin, but not CAT, upregulated in zebrafish  
260 skeletal muscle under cold stress. Similarly, our previous studies also found that when  
261 *S. aequifasciatus* under chronic cold stress, the activities of SOD and GPx, and level  
262 of GSH increased while the production of ROS increased, but the production of MDA  
263 not increased (Wen et al., 2018). Unlike chronic cold stress, acute cold stress caused  
264 oxidative damage on both species, revealed by the increased level of MDA and PC  
265 (Almroth et al., 2008; Enzor and Place, 2014; Trenzado et al., 2006). Due to the  
266 antioxidative index was directly correlated to temperature, it therefore appears that  
267 oxidative stress levels could provide information on cold hardiness of fish.

#### 268 4.2 Is oxidative stress higher in *S. aequifasciatus* than *S. haraldi*?

269 The excess ROS leading to oxidative stress in fish (Atli et al., 2016; Joe, 2017;  
270 Martínez-Álvarez et al., 2005). Therefore, the present study showed that the ADS  
271 might be able to successfully prevent oxidative stress in *S. haraldi*, but in *S.*  
272 *aequifasciatus* (Ates et al., 2008; Atli and Canli, 2007; Eyckmans et al., 2011).

273 The ADS, such as SOD, CAT, GPX and GR, usually act in a coordinated manner  
274 in order to ensure the optimal protection against oxidative stress (Morales-Medina et  
275 al., 2017). Following temperature reduction, SOD and GPx activities also upregulated  
276 in zebrafish skeletal (Malek et al., 2004). The research in cunner (*Tautogolabrus*  
277 *adpersus*) also found that fish acclimated to cold temperature had higher levels of  
278 GR transcript in both the head kidney and liver (Alzaid et al., 2015). Attributed to  
279 complementary activity of GPX to CAT activity, CAT activity usually showed  
280 increased trend while a decreasing trend was observed for GPX (Atli and Canli, 2010;

281 Saglam et al., 2014; Santovito et al., 2012). GSH also can neutralise ROS, playing an  
282 important role as a cofactor for various glutathione-dependent antioxidant enzymes  
283 (Grim et al., 2013; Halliwell and Gutteridge, 2007; Sedlak and Lindsay, 1968). For  
284 example, Heise et al. (2007) found that GSH content was two to three times more  
285 concentrated in polar compared to temperate eelpout liver, suggesting that polar  
286 eelpout are more susceptible than their North Sea confamilials. Klein et al (2017)  
287 putted forward an idea that the higher SOD and CAT activity observed in peripheral  
288 tissues of *N. rossii* respect with *N. coriiceps* might showed the former need a more  
289 powerful ADS than the latter fish species. In this case, it seems that *S. aequifasciatus*  
290 was more susceptible than *S. haraldi*, and needs more powerful ADS.

291 But at the same time, MDA content, as oxidative damage marker (Joy et al., 2017;  
292 Ren et al., 2018; Vinagre et al., 2012; Ye et al., 2016) was significantly higher in *S.*  
293 *aequifasciatus* than in *S. haraldi*. It suggested that *S. haraldi* better protected from  
294 oxidative damage than *S. aequifasciatus*.

295 From the above, oxidative stress higher in *S. aequifasciatus* than *S. haraldi* under  
296 acute cold stress.

297 4.3 The reason of species-specific cold resistance between *S. aequifasciatus* and *S.*  
298 *haraldi*

299 In addition to their Amazon basin-wide distribution, different environmental pressure  
300 were subjected by discus fish in different geographic gradients (Eliason et al., 2011;  
301 Heise et al., 2007; Troia and Gido, 2016 and 2017;). Noteworthily, *S. aequifasciatus*  
302 distributes at the upstream of Amazon River, and *S. haraldi* distributes at the

303 midstream and downstream, while both species distribute at the similar latitudinal  
304 gradients (Ready et al., 2006). A recent research by Carmona-Catot (2011) found that  
305 upstream-to-downstream gradients are as influential as latitudinal gradients in shaping  
306 growth, reproduction, and body condition among European populations of *Gambusia*  
307 *holbrooki*. And Model results from the Madison River in Montana indicate that, on  
308 average, rainbow trout at the downstream site (B) would have a stress index that is  
309  $2\pm 3$  times greater than rainbow trout at the upstream site (A) even though the  
310 difference in mean temperature is only 0.48 °C (Bevelhimer and Bennett, 2000). It  
311 suggested that *S. haraldi* had a greater stress index than *S. aequifasciatus* likely  
312 contribute to the upstream-to-downstream gradients.

313 Environmental pressure has led fish in the region to develop considerable  
314 genomic plasticity during their evolutionary process, and a series of ecological,  
315 morphological, physiological, metabolic and molecular adjustments can be seen.  
316 Indeed, the analysis of mitochondrial DNA haplotypes, chromosomal complement  
317 and meiotic organization indicates that the western Amazonian *Symphysodon*, *S.*  
318 *aequifasciatus*, showed interspecific variability from the central Amazonian  
319 *Symphysodon*, *S. haraldi* (Gross et al., 2009; Gross et al., 2010; Gross et al., 2006;  
320 Ready et al., 2006). These adjustments might help them to maintain organic  
321 homeostasis and allow them to survive during these environmental changes.  
322 According to Chippari-Gomes (2003), *Symphysodon* species positively exhibited  
323 different adapt capacity, which allows them to survive in conditions of moderate  
324 hypoxia. Place et al. (2004) found that the loss of the HSR in the Antarctic

325 notothenioids resulted in the inability of *T. bernacchii* to upregulate hsp70 mRNA  
326 during a 1 h in vitro thermal stress at temperatures as high as +10°C. In contrast to the  
327 loss of the HSR in the notothenioids, *Lycodichthys dearborni*, a phylogenetically  
328 distant Antarctic species, has retained the ability to upregulate the expression of the  
329 hsp70 gene in response to thermal stress (Place and Hofmann 2005). In view of these,  
330 there should be a more extensive study using molecular methodologies to clarify the  
331 genetic variability which correlated with adaptation to temperature among two  
332 species.

### 333 **5. Conclusion**

334 The ROS generation, ADS and oxidative damage can be used as hardiness indexes in  
335 *Symphysodon. S. haraldi* which is found in the central portion of the Amazon basin  
336 show a stronger cold resistance than *S. aequifasciatus* which is found in the west  
337 portion of the Amazon basin, exhibiting a significant interspecific variability under  
338 acute cold stress.

339

### 340 **Acknowledgements**

341 The authors are grateful to anonymous referees for professional judgment of the  
342 manuscript that helped substantially improve the work.

### 343 **Competing interests**

344 We have no competing interests.

### 345 **Author contributions**

346 B.W. drafted the paper, S.R.J. conducted the measurement and analysis, Z.Z.C. and



347 J.Z.G. designed the research, L.W. conducted the Methodology, H.P.L. conducted the  
348 animal culture, Y.L. conducted the sampling procedures.

#### 349 **Funding**

350 The study presented in the manuscript was funded by the Shanghai Sailing Plan for  
351 the Young Scientific Talents (19YF1419400).

#### 352 **Supplementary information**

353 This article has no supplementary information.

354

355

#### 356 **References**

357 **Alzaid, A., Hori, T. S., Hall, J. R., Rise, M. L. and Gamperl, A. K.** (2015).

358 Cold-induced changes in stress hormone and steroidogenic transcript levels in  
359 cunner (*Tautoglabrus adspersus*), a fish capable of metabolic depression. *Gen.*  
360 *Comp. Endocrinol.* **224**, 126-135.

361 **Almroth, B. C., Sturve, J., Stephensen, E., Holth, T. F. and Förlin, L.** (2008).

362 Protein carbonyls and antioxidant defenses in corkwing wrasse (*Symphodus melops*)  
363 from a heavy metal polluted and a PAH polluted site. *Mar. Environ. Res.* **66**,  
364 271-277.

365 **Ates, B., Orun, I., Talas, Z. S., Durmaz, G. and Yilmaz, I.** (2008). Effects of

366 sodium selenite on some biochemical and hematological parameters of rainbow  
367 trout (*Oncorhynchus mykiss* Walbaum, 1792) exposed to Pb<sup>2+</sup> and Cu<sup>2+</sup>. *Fish*  
368 *Physiol. Biochem.* **34**, 53-59.

369 **Atli, G. and Canli, M.** (2007). Enzymatic responses to metal exposures in a

370 freshwater fish *Oreochromis niloticus*. *Comp. Biochem. Physiol. C. Toxicol.*  
371 *Pharmacol.* **145**, 282-287.

372 **Atli, G. and Canli, M.** (2010). Response of antioxidant system of freshwater fish

373 *Oreochromis niloticus* to acute and chronic metal (Cd, Cu, Cr, Zn, Fe) exposures.

- 374 Ecotoxicol. Environ. Saf. **73**, 1884-1889.
- 375 **Atli, G., Canli, E. G., Eroglu, A. and Canli, M.** (2016). Characterization of  
376 antioxidant system parameters in four freshwater fish species. Ecotoxicol. Environ.  
377 Saf. **126**, 30-37.
- 378 **Ban, M.** (2000). Effects of photoperiod and water temperature on smoltification of  
379 yearling sockeye salmon (*Oncorhynchus nerka*). Bulletin of the National Resources  
380 Center **3**, 25–28.
- 381 **Bevelhimer, M. and Bennett, W.** (2000). Assessing cumulative thermal stress in fish  
382 during chronic intermittent exposure to high temperatures. Environ. Sci. Policy **3**,  
383 211-216.
- 384 **Bleher, H., Stölting, K. N., Salzburger, W. and Meyer, A.** (2007). Revision of the  
385 genus *Symphysodon* Heckel, 1840 (Teleostei: Perciformes: Cichlidae) based on  
386 molecular and morphological characters. Aquaculture **12**, 133–174.
- 387 **Bryant, H. J., Chung, D. J. and Schulte, P. M.** (2018). Subspecies differences in  
388 thermal acclimation of mitochondrial function and the role of uncoupling proteins  
389 in killifish. J. Exp. Biol. **221**, 1-15.
- 390 **Carlberg, I. N. C. E. R. and Mannervik, B. E. N. G. T.** (1975). Purification and  
391 characterization of the flavoenzyme glutathione reductase from rat liver. J. Biol.  
392 Chem. **250**, 5475-5480.
- 393 **Carmona-Catot, G., Benito, J. and Garcia-Berthou, E.** (2011). Comparing  
394 latitudinal and upstream-downstream gradients: life history traits of invasive  
395 mosquitofish. Divers. Distrib. **17**, 214–224.
- 396 **Chippari-Gomes, A. R., Lopes, N. P., Paula-Silva, M. N., Oliveira, A. R. and**  
397 **Almeida-Val, V. M. F.** (2003). Hypoxia tolerance and adaptations in fishes: the  
398 case of Amazon cichlids. In *Fish Adaptation* 37–54. Science Publishers.
- 399 **Chung, D. J., Bryant, H. J. and Schulte, P. M.** (2017). Thermal acclimation and  
400 subspecies-specific effects on heart and brain mitochondrial performance in a  
401 eurythermal teleost (*Fundulus heteroclitus*). J. Exp. Biol. **220**, 1459-1471.
- 402 **Eliason, E. J., Clark, T. D., Hague, M. J., Hanson, L. M., Gallagher, Z. S., Jeffries,**  
403 **K. M., Gale, M. K., Patterson, D. A., Hinch, S. G. and Farrell, A. P.** (2011).

- 404 Differences in thermal tolerance among sockeye salmon populations. *Science* **332**,  
405 109-112.
- 406 **Enzor, L. A. and Place, S. P.** (2014). Is warmer better? Decreased oxidative damage  
407 in notothenioid fish after long-term acclimation to multiple stressors. *J. Exp. Biol.*  
408 **217**, 3301-3310.
- 409 **Eyckmans, M., Celis, N., Horemans, N., Blust, R. and De Boeck, G.** (2011).  
410 Exposure to waterborne copper reveals differences in oxidative stress response in  
411 three freshwater fish species. *Aquat. Toxicol.* **103**, 112-120.
- 412 **Farias, I. P. and Hrbek, T.** (2008). Patterns of diversification in the discus fishes  
413 (*Symphysodon spp.* Cichlidae) of the Amazon basin. *Mol. Phylogenet. Evol.* **49**,  
414 32-43.
- 415 **Grim, J. M., Simonik, E. A., Semones, M. C., Kuhn, D. E. and Crockett, E. L.**  
416 (2013). The glutathione-dependent system of antioxidant defense is not modulated  
417 by temperature acclimation in muscle tissues from striped bass, *Morone saxatilis*.  
418 *Comp. Biochem. Physiol. A. Mol. Integr. Physiol.* **164**, 383-390.
- 419 **Gross, M. C., Feldberg, E., Cella, D. M., Schneider, M. C., Schneider, C. H. and**  
420 **Porto, J. I. R.** (2009). Intriguing evidence of translocations in discus fish  
421 (*Symphysodon*, Cichlidae) and a report of the largest meiotic chromosomal chain in  
422 vertebrates. *Heredity* **102**, 435-441.
- 423 **Gross, M. C., Schneider, C. H., Valente, G. T., Porto, J. I. R., Martins, C. and**  
424 **Feldberg, E.** (2009). Comparative cytogenetic analysis of the genus *Symphysodon*  
425 (Discus Fishes, Cichlidae): chromosomal characteristics of retrotransposons and  
426 minor ribosomal DNA. *Cytogenet. Genome Res.* **127**, 43-53.
- 427 **Habig, W. H., Pabst, M. J. and Jakoby, W. B.** (1974). Glutathione S-transferases the  
428 first enzymatic step in mercapturic acid formation. *J Biol Chem* **249**, 7130-7139.
- 429 **Hafeman, D. G., Sunde, R. A. and Hoekstra, W. G.** (1974). Effect of dietary  
430 selenium on erythrocyte and liver glutathione peroxidase in the rat. *J. Nutr.* **104**,  
431 580-587.
- 432 **Halliwell, B. and Gutteridge, J.** (2007). *Free Radicals in Biology and Medicine* 4th  
433 ed. Oxford: Oxford University Press.
- 434 **Heise, K., Estevez, M. S., Puntarulo, S., Galleano, M., Nikinmaa, M., Pörtner, H.**

- 435 **O. and Abele, D.** (2007). Effects of seasonal and latitudinal cold on oxidative  
436 stress parameters and activation of hypoxia inducible factor (HIF-1) in zoarcid fish.  
437 *J. Comp. Physiol. B.* **177**, 765-777.
- 438 **Joe, M.** (2017). The oxidative stress and antioxidant responses of live Chinese shrimp,  
439 *Fenneropenaeus chinensis*, to low temperature and air exposure. *Fish Shellfish*  
440 *Immun.* **72**, 564-571.
- 441 **Johansson, L. H. and Borg, L. H.** (1988). A spectrophotometric method for  
442 determination of catalase activity in small tissue samples. *Anal. Biochem.* **174**,  
443 331-336.
- 444 **Johnston, I. A., Calvo, J., Guderley, H., Fernandez, D. and Palmer, L.** (1998).  
445 Latitudinal variation in the abundance and oxidative capacities of muscle  
446 mitochondria in perciform fishes. *J. Exp. Biol.* **201**, 1-12.
- 447 **Joy, S., Alikunju, A. P., Jose, J., Sudha, H. S. H., Parambath, P. M., Puthiyedathu,**  
448 **S. T. and Philip, B.** (2017). Oxidative stress and antioxidant defense responses of  
449 *Etroplus suratensis* to acute temperature fluctuations. *J. Therm. Biol.* **70**, 20-26.
- 450 **Klein, R. D., Rosa, C. E., Colares, E. P., Robaldo, R. B., Martinez, P. E. and**  
451 **Bianchini, A.** (2017). Antioxidant defense system and oxidative status in Antarctic  
452 fishes: the sluggish rockcod *Notothenia coriiceps* versus the active marbled  
453 notothen *Notothenia rossii*. *J. Therm. Biol.* **68**, 119-127.
- 454 **Koh, T. L., Khoo, G., Fan, L. Q. and Phang, V. P. E.** (1999). Genetic diversity  
455 among wild forms and cultivated varieties of discus (*Symphysodon spp.*) as  
456 revealed by random amplified polymorphic DNA (RAPD) fingerprinting.  
457 *Aquaculture* **173**, 485-497.
- 458 **Levine, A., Tenhaken, R., Dixon, R. and Lamb, C.** (1994). H<sub>2</sub>O<sub>2</sub> from the  
459 oxidative burst orchestrates the plant hypersensitive disease resistance response.  
460 *Cell* **79**, 583-593.
- 461 **Malek, R. L., Sajadi, H., Abraham, J., Grundy, M. A. and Gerhard, G. S.** (2004).  
462 The effects of temperature reduction on gene expression and oxidative stress in  
463 skeletal muscle from adult zebrafish. *Comp. Biochem. Physiol. C. Toxicol.*  
464 *Pharmacol.* **138**, 363-373.
- 465 **Martínez-Álvarez, R. M., Morales, A. E. and Sanz, A.** (2005). Antioxidant defenses  
466 in fish: biotic and abiotic factors. *Rev. Fish Biol. Fisher.* **15**, 75-88.
- 467 **McCord, J. M. and Fridovich, I.** (1969). Superoxide dismutase an enzymic function  
468 for erythrocyte (hemocuprein). *J. Biol. Chem.* **244**, 6049-6055.

- 469 **Morales-Medina, R., Perez, R., Guadix, A. and Guadix, E. M.** (2017).  
470 Multiobjective optimization of the antioxidant activities of horse mackerel  
471 hydrolysates produced with protein mixtures. *Process Biochem.* **52**, 149–158.
- 472 **Ohkawa, H., Ohishi, N. and Yagi, K.** (1979). Assay for lipid peroxides in animal  
473 tissues by thiobarbituric acid reaction. *Anal. Biochem.* **95**, 351-358.
- 474 **Place, S. P. and Hofmann, G. E.** (2005). Constitutive expression of a stress-inducible  
475 heat shock protein gene, hsp70, in phylogenetically distant Antarctic fish. *Polar*  
476 *Biol.* **28**, 261-267.
- 477 **Place, S. P., Zippay, M. L. and Hofmann, G. E.** (2004). Constitutive roles for  
478 inducible genes: evidence for the alteration in expression of the inducible hsp70  
479 gene in Antarctic notothenioid fishes. *Am. J. Physiol-Reg. I.* **287**, 429-436.
- 480 **Ready, J. S., Ferreira, E. J. G. and Kullander, S. O.** (2006). Discus fishes:  
481 mitochondrial DNA evidence for a phylogeographic barrier in the Amazonian  
482 genus *Symphysodon* (Teleostei: Cichlidae). *J. Fish Biol.* **69**, 200-211.
- 483 **Ren, J., Liu, C., Zhao, D. and Fu, J.** (2018). The role of heat shock protein 70 in  
484 oxidant stress and inflammatory injury in quail spleen induced by cold stress.  
485 *Environ. Sci. Pollut. Res. Int.* **25**, 1-13.
- 486 **Reznick, A. Z. and Packer, L.** (1994). Oxidative damage to proteins:  
487 Spectrophotometric method for carbonyl assay. *Methods Enzymol.* **233**, 357-363.
- 488 **Rudneva-Titova, I. I. and Zherko, N. V.** (1994). Effect of polychlorinated biphenyls  
489 on the activity of antioxidant enzymes and lipid peroxidation in muscles and liver  
490 of two species of black sea fish. *Biokhimiia* **59**, 34-44.
- 491 **Saglam, D., Atli, G., Dogan, Z., Baysoy, E., Gurler, C., Eroglu, A. and Canli, M.**  
492 (2014). Response of the antioxidant system of freshwater fish (*Oreochromis*  
493 *niloticus*) exposed to metals (Cd, Cu) in differing hardness. *Turk. J. Fish Aquat. Sc.*  
494 **14**, 43-52.
- 495 **Santovito, G., Piccinni, E., Boldrin, F. and Irato, P.** (2012). Comparative study on  
496 metal homeostasis and detoxification in two Antarctic teleosts. *Comp. Biochem.*  
497 *Physiol. C. Toxicol. Pharmacol.* **155**, 580-586.
- 498 **Sedlak, J. and Lindsay, R. H.** (1968). Estimation of total, protein-bound, and  
499 nonprotein sulfhydryl groups in tissue with Ellman's reagent. *Anal. Biochem.* **25**,  
500 192-205.
- 501 **Shaliutinakolešová, A., Gazo, I., Cosson, J. and Linhart, O.** (2013). Comparison of  
502 oxidant and antioxidant status of seminal plasma and spermatozoa of several fish

- 503 species. Czech J. Anim. Sci. **58**, 313-320.
- 504 **Sun, L. T., Chen, G. R. and Chang, C. F.** (1995). Acute responses of blood  
505 parameters and comatose effects in salt-acclimated tilapias exposed to low  
506 temperatures. J. Therm. Biol. **20**, 299–306.
- 507 **Tietze, F.** (1969). Enzymic method for quantitative determination of nanogram  
508 amounts of total and oxidized glutathione: applications to mammalian blood and  
509 other tissues. Anal. Biochem. **27**, 502-522.
- 510 **Trenzado, C., Hidalgo, M. C., García-Gallego, M., Morales, A. E., Furné, M.,**  
511 **Domezain, A. and Sanz, A.** (2006). Antioxidant enzymes and lipid peroxidation in  
512 sturgeon *Acipenser naccarii* and trout *Oncorhynchus mykiss*. A comparative study.  
513 Aquaculture **254**, 758-767.
- 514 **Troia, M. J. and Gido, K. B.** (2015). Functional strategies drive community  
515 assembly of stream fishes along environmental gradients and across spatial scales.  
516 Oecologia **177**, 545-559.
- 517 **Troia, M. J. and Gido, K. B.** (2017). Testing metabolic cold adaptation as a driver of  
518 warm-water fish species replacement along the river continuum. Environ. Biol.  
519 Fish **100**, 265-279.
- 520 **Uchiyama, M. and Mihara, M.** (1978). Determination of malonaldehyde precursor  
521 in tissues by thiobarbituric acid test. Anal. Biochem. **86**, 271-278.
- 522 **Vinagre, C., Madeira, D., Narciso, L., Cabral, H. N. and Diniz, M.** (2012). Effect  
523 of temperature on oxidative stress in fish: lipid peroxidation and catalase activity in  
524 the muscle of juvenile seabass, *Dicentrarchus labrax*. Ecol. Indic. **23**, 274-279.
- 525 **Wen, B., Jin, S. R., Chen, Z. Z. and Gao, J. Z.** (2018). Physiological responses to  
526 cold stress in the gills of discus fish (*Symphysodon aequifasciatus*) revealed by  
527 conventional biochemical assays and GC-TOF-MS metabolomics. Sci. Total  
528 Environ. **640**, 1372-1381.
- 529 **Wen, B., Jin, S. R., Chen, Z. Z., Gao, J. Z., Wang, L., Liu, Y. and Liu, H. P.** (2017).  
530 Plasticity of energy reserves and metabolic performance of discus fish  
531 (*Symphysodon aequifasciatus*) exposed to low-temperature stress. Aquaculture **481**,  
532 169-176.
- 533 **Wang, Y., Hu, M., Cheung, S. G., Shin, P. K. S., Lu, W. and Li, J.** (2012). Chronic  
534 hypoxia and low salinity impair anti-predatory responses of the green-lipped  
535 mussel *Perna viridis*. Mar. Environ. Res. **77**, 84-89.
- 536 **Ye, C. X., Wan, F., Sun, Z. Z., Cheng, C. H., Ling, R. Z., Fan, L. F. and Wang, A.**

- 537 L. (2016). Effect of phosphorus supplementation on cell viability, anti-oxidative  
538 capacity and comparative proteomic profiles of puffer fish (*Takifugu obscurus*)  
539 under low temperature stress. *Aquaculture* **452**, 200-208.
- 540 **Zhang, B. Q., Yang, L. T. and Li, Y. R.** (2015). Physiological and biochemical  
541 characteristics related to cold resistance in sugarcane. *Sugar Tech.* **17**, 49-58.
- 542 **Zhao, W. Q., Lv, X. H., Li, Y. G., Wang, Z. K., Zhang, W. and Zhuang, L.** (2019).  
543 Future N deposition and precipitation changes will be beneficial for the growth of  
544 *Haloxylon ammodendron* in Gurbantunggut Desert, northwest China. *Sci. Rep.* **9**,  
545 4001.
- 546

1 Figure captions

2 **Fig. 1.** Scheme of the experimental design. Water temperature changes (solid line) and  
3 sampling times (t1-t6).

4 **Fig. 2.** Production of reactive oxygen species in the gills of two subspecies of  
5 *Symphysodon spp.* red line, *S. aequifasciatus* and blue line, *S. haraldi*. Data are  
6 presented as means  $\pm$ SD (n=3). \*indicates significant differences ( $p<0.05$ ) between  
7 subspecies. Different uppercase letters indicate significant differences ( $p<0.05$ )  
8 between sampling times within the *S. aequifasciatus*. Different lowercase letters  
9 indicate significant differences ( $p<0.05$ ) between sampling times within the *S.*  
10 *haraldi*.

11 **Fig. 3.** Activities of SOD (a), GR (b), CAT (c), GPx (d) and GST (e) in the gills of  
12 two subspecies of *Symphysodon spp.* were measured. red line, *S. aequifasciatus* and  
13 blue line, *S. haraldi*. Data are presented as means  $\pm$ SD (n=3). \*indicates significant  
14 differences ( $p<0.05$ ) between subspecies. Different uppercase letters indicate  
15 significant differences ( $p<0.05$ ) between sampling times within the *S. aequifasciatus*.  
16 Different lowercase letters indicate significant differences ( $p<0.05$ ) between sampling  
17 times within the *S. haraldi*.

18 **Fig. 4.** Level of reduced GSH in the gills of two subspecies of *Symphysodon spp.* red  
19 line, *S. aequifasciatus* and blue line, *S. haraldi*. Data are presented as means  $\pm$ SD  
20 (n=3). \*indicates significant differences ( $p<0.05$ ) between subspecies. Different  
21 uppercase letters indicate significant differences ( $p<0.05$ ) between sampling times  
22 within the *S. aequifasciatus*. Different lowercase letters indicate significant



23 differences ( $p < 0.05$ ) between sampling times within the *S. haraldi*.

24 **Fig. 5.** Levels of PC (a) and MDA (b) in the gills of two subspecies of *Symphysodon*  
25 *spp.* red line, *S. aequifasciatus* and blue line, *S. haraldi*. Data are presented as means  
26  $\pm$ SD (n=3). \*indicates significant differences ( $p < 0.05$ ) between subspecies. Different  
27 uppercase letters indicate significant differences ( $p < 0.05$ ) between sampling times  
28 within the *S. aequifasciatus*. Different lowercase letters indicate significant  
29 differences ( $p < 0.05$ ) between sampling times within the *S. haraldi*.

30 **Fig. 6.** Heat-map visualization of the differential biomarkers of oxidative stress in  
31 response to cold stress between two species. Colour denotes the abundance of  
32 biomarkers of oxidative stress, from the highest (red) to the lowest (blue).

33

34 Fig. 1

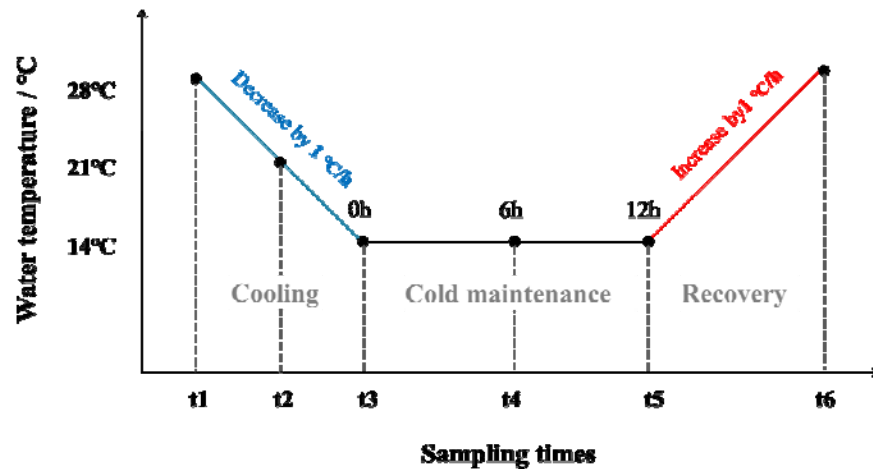

35

36

37 Fig. 2

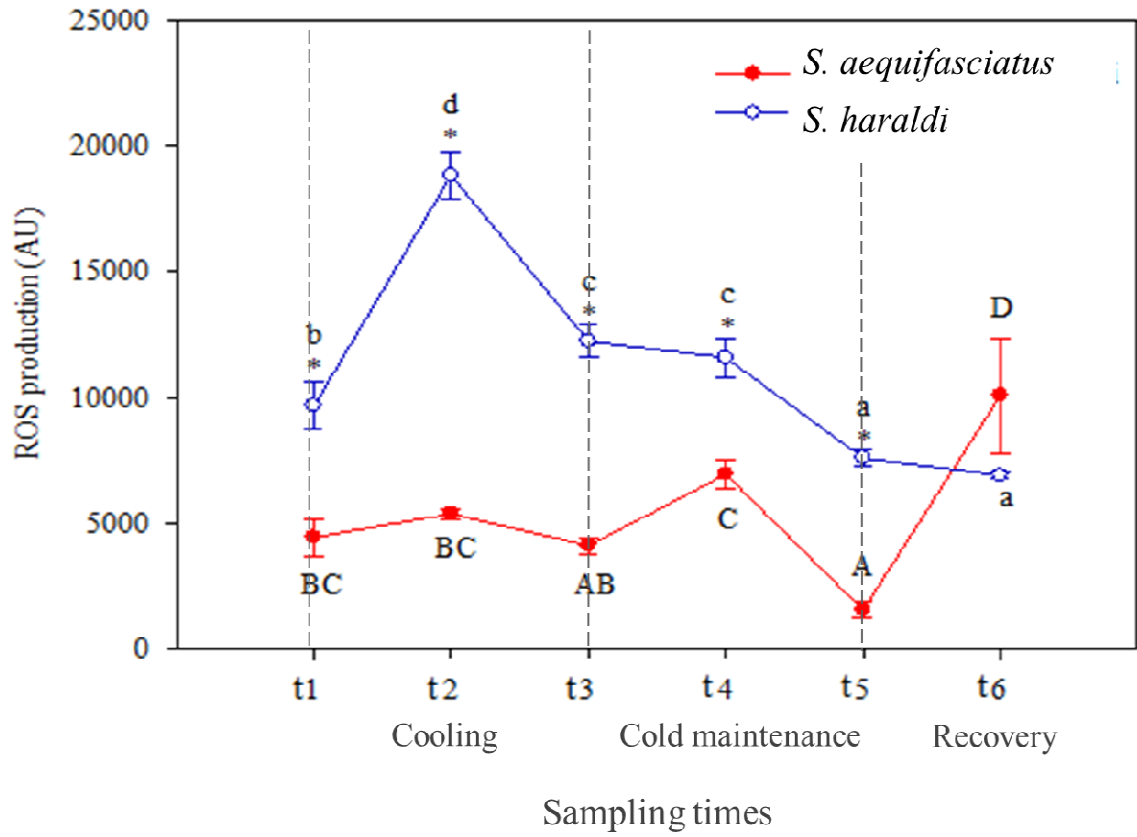

38

39

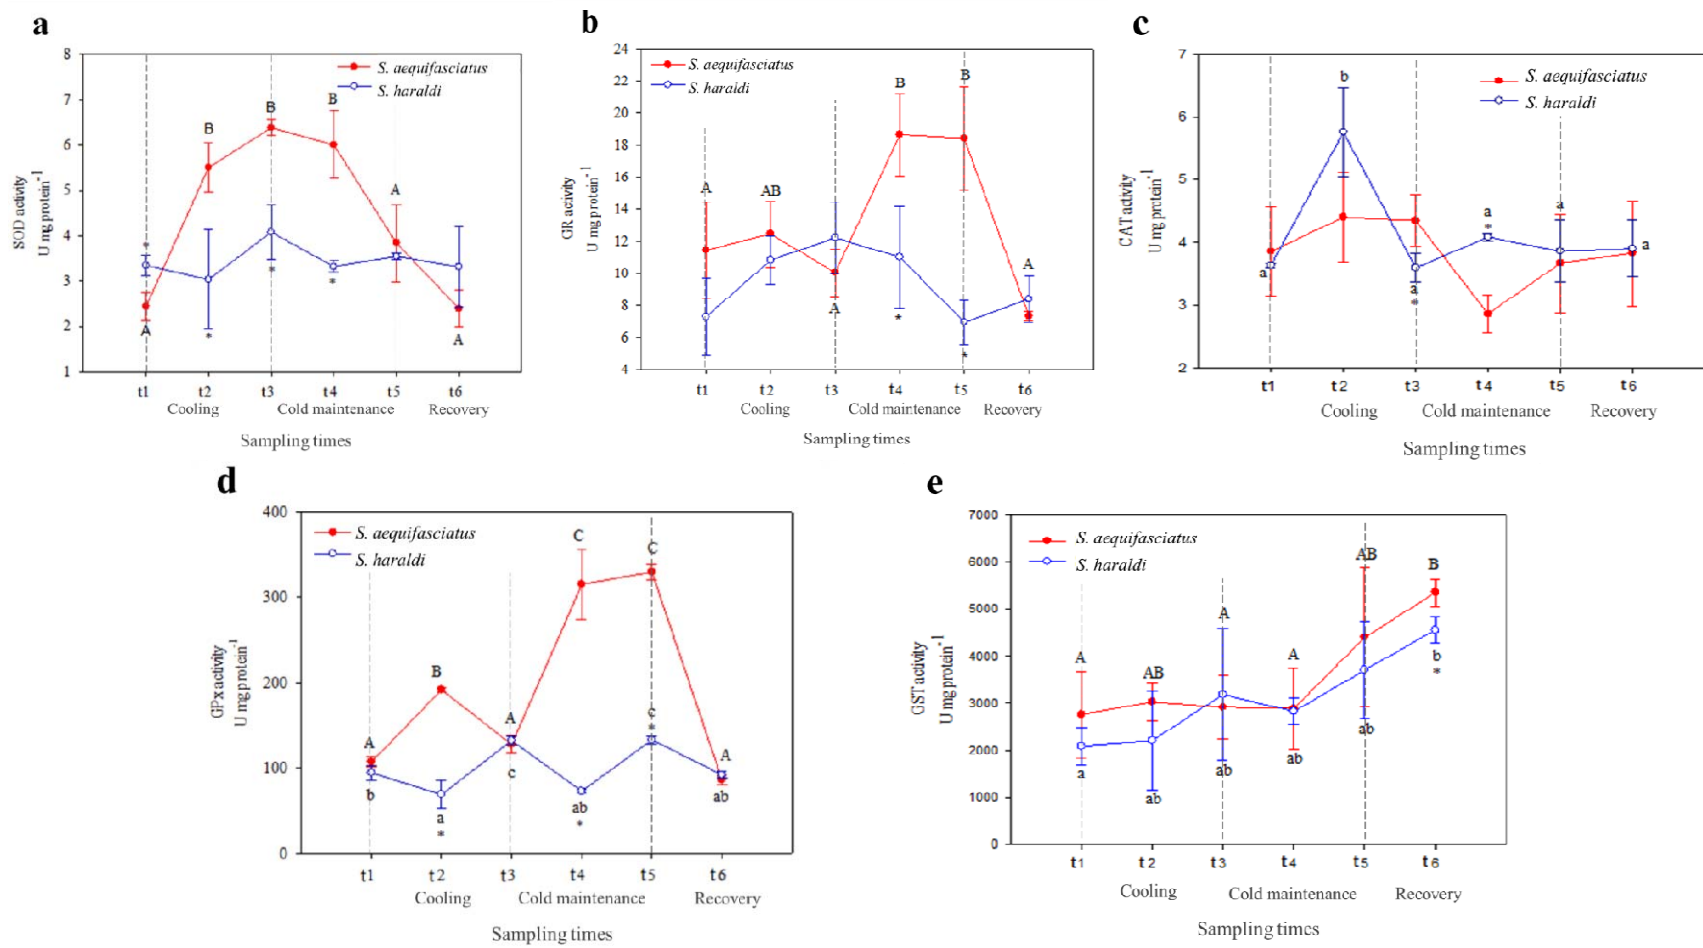

40 Fig. 3

41 Fig. 4

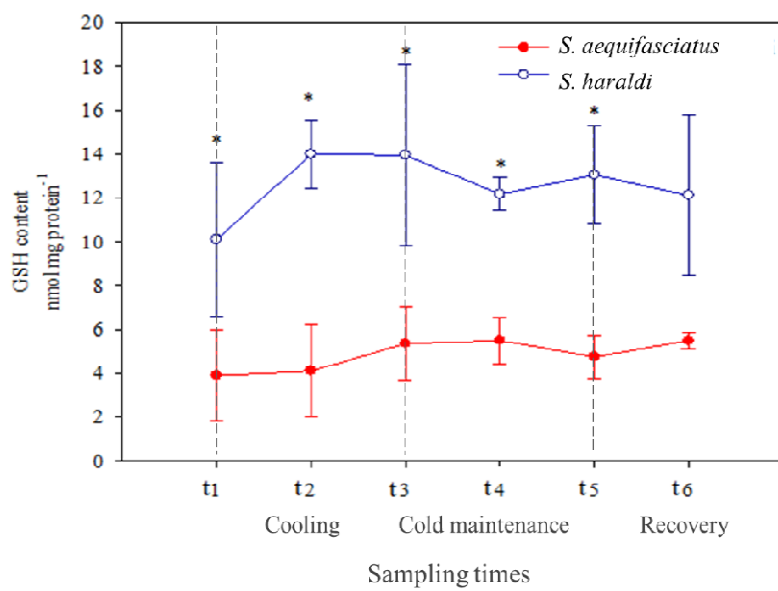

42

43

44 Fig. 5.

**a**

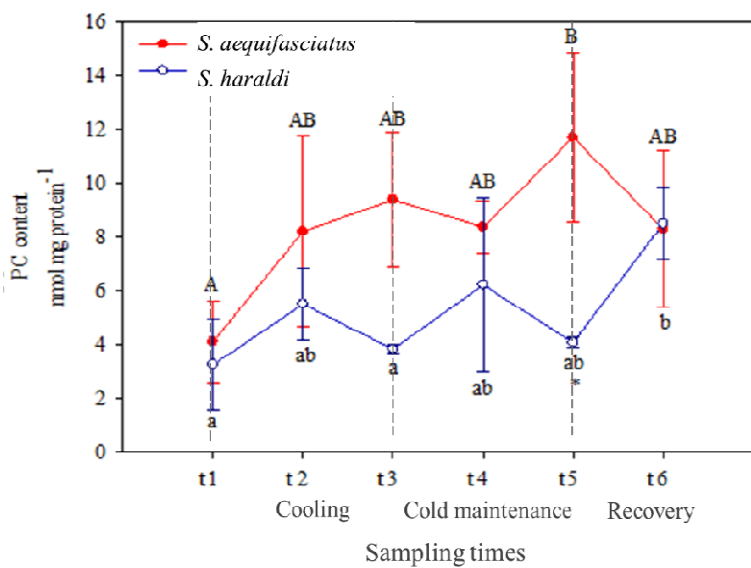

**b**

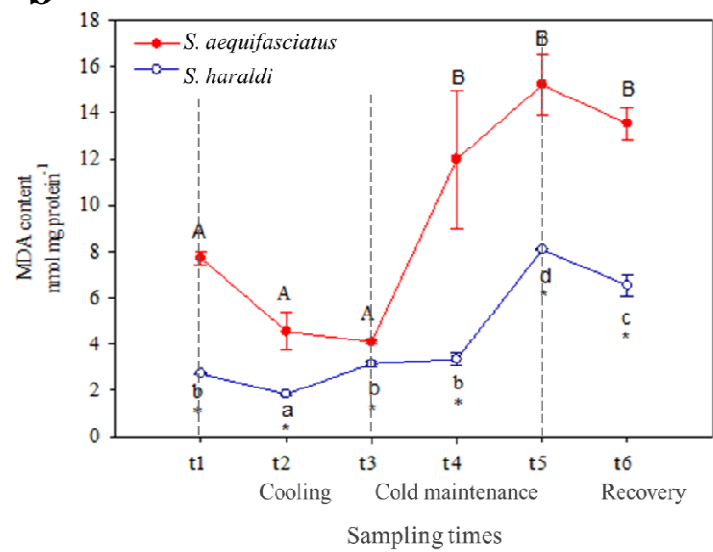

45

46



Table 1. Correlation analyses among cold-resistance indices

| Index | GPx     | CAT     | GR     | GSH    | GST     | SOD     | MDA    | PC     | ROS |
|-------|---------|---------|--------|--------|---------|---------|--------|--------|-----|
| GPx   | 1       |         |        |        |         |         |        |        |     |
| CAT   | -0.724* | 1       |        |        |         |         |        |        |     |
| GR    | 0.796*  | -0.765* | 1      |        |         |         |        |        |     |
| GSH   | -0.188  | 0.479*  | -0.035 | 1      |         |         |        |        |     |
| GST   | 0.63*   | -0.855* | 0.825* | -0.079 | 1       |         |        |        |     |
| SOD   | -0.032  | 0.622*  | -0.087 | 0.694* | -0.495* | 1       |        |        |     |
| MDA   | -0.75*  | 0.709*  | -0.391 | 0.652* | -0.489* | 0.524*  | 1      |        |     |
| PC    | -0.042  | -0.305  | -0.164 | -0.163 | 0.408   | -0.719* | -0.4   | 1      |     |
| ROS   | 0.727*  | -0.218  | 0.626* | 0.01   | 0.301   | 0.329   | -0.425 | -0.373 | 1   |

\* denote significant at the 0.05 probability levels

Table 2. The eigenvalues, proportions and cumulative of principal components

| Principal component | Eigenvalue | Proportion % | Cumulative % |
|---------------------|------------|--------------|--------------|
| Z1                  | 4.493      | 49.921       | 49.921       |
| Z2                  | 2.495      | 27.723       | 77.644       |
| Z3                  | 1.139      | 12.658       | 90.302       |



Table 3. The value of comprehensive index [Zi], index weight, u (Xi), D value and comprehensive valuation for each treatment of two species.

| Species                                    | Z1     | Z2     | Z3     | u (X1) | u (X2) | u (X3) | D     | Comprehensive comparison |
|--------------------------------------------|--------|--------|--------|--------|--------|--------|-------|--------------------------|
| <i>S. aequifasciatus</i> -cooling          | -2.378 | 2.221  | -0.309 | 0.000  | 1.000  | 0.313  | 0.351 | **                       |
| <i>S. haraldi</i> -cooling                 | 0.853  | 0.954  | 1.708  | 0.533  | 0.727  | 1.000  | 0.658 | ***                      |
| <i>S. aequifasciatus</i> -cold maintenance | 3.684  | 0.180  | -0.400 | 1.000  | 0.560  | 0.282  | 0.764 | ***                      |
| <i>S. haraldi</i> -cold maintenance        | -0.180 | -0.875 | -1.227 | 0.363  | 0.332  | 0.000  | 0.302 | **                       |
| <i>S. aequifasciatus</i> -recovery         | -1.497 | -2.414 | 0.819  | 0.145  | 0.000  | 0.697  | 0.178 | *                        |
| <i>S. haraldi</i> -recovery                | -0.482 | -0.066 | -0.590 | 0.313  | 0.507  | 0.217  | 0.359 | **                       |
| Index weight                               |        |        |        | 0.553  | 0.307  | 0.140  |       |                          |

\*\*\*, 0.60–1.00, for high cold tolerance; \*\*, 0.30–0.59, for moderate cold tolerance and; \*, 0–0.29, for low cold resistance.
